# Supplementary material for: Large volumetric thermal expansion of a novel organic cocrystal over a wide temperature range
Source: Royal Society of Chemistry journal article supplement (doi:10.1039/c7ce01848g), 2018-01-01
Supplement: c7ce01848g1.pdf [file c7ce01848g1.pdf]

# Large volumetric thermal expansion of a novel organic cocrystal over a wide temperature range

Lukman O. Alimi, Prem Lama, Vincent J. Smith and Leonard J. Barbour\*

Department of Chemistry and Polymer Science, University of Stellenbosch, Matieland 7602, South Africa.

E-mail: [ljb@sun.ac.za](mailto:ljb@sun.ac.za)

## Supplementary Information:

- 1) **Experimental Information:**
- 2) **Single crystal X-ray diffraction measurements**
- 3) **Unit cell parameters for ABN·2DMABN cocrystal from 300 to 100 K at 20 K intervals**
- 4) **Powder X-ray diffraction measurements**
- 5) **Hot stage Microscopy**
- 6) **Differential Scanning Calorimetry**
- 7) **Thermal expansion coefficients**
- 8) **Intermolecular interactions within the structure**

## 1) Experimental Information

The 4-aminobenzonitrile (ABN) and 4-(dimethylamino)benzonitrile (DMABN) used in the preparation of **ABN·2DMABN** cocrystal were purchased from Sigma Aldrich and used without further purification.

### Preparation of **ABN·2DMABN** cocrystal:

#### Method 1

Cocrystals were obtained by dissolving ABN (59.07 mg, 0.5 mmol) and DMABN (146.19 mg, 1.0 mmol) in 1ml of acetone. Slow evaporation over several days yielded single crystals suitable for X-ray diffraction.

#### Method 2

The mechanochemical method was also used for cocrystallisation. ABN (100 mg, 0.85 mmol) was ground with DMABN (248.5 mg, 1.7 mmol) in a pre-washed and dried agate mortar and pestle. The combination was ground for 2 h; the formation of the new materials was monitored by periodically measuring the PXRD pattern until a new pattern emerged. Cocrystals were obtained by dissolving (20 mg, 0.049 mmol) of ground materials in 1ml of acetone. Slow evaporation over 5-7 days yielded single crystals suitable for X-ray diffraction.

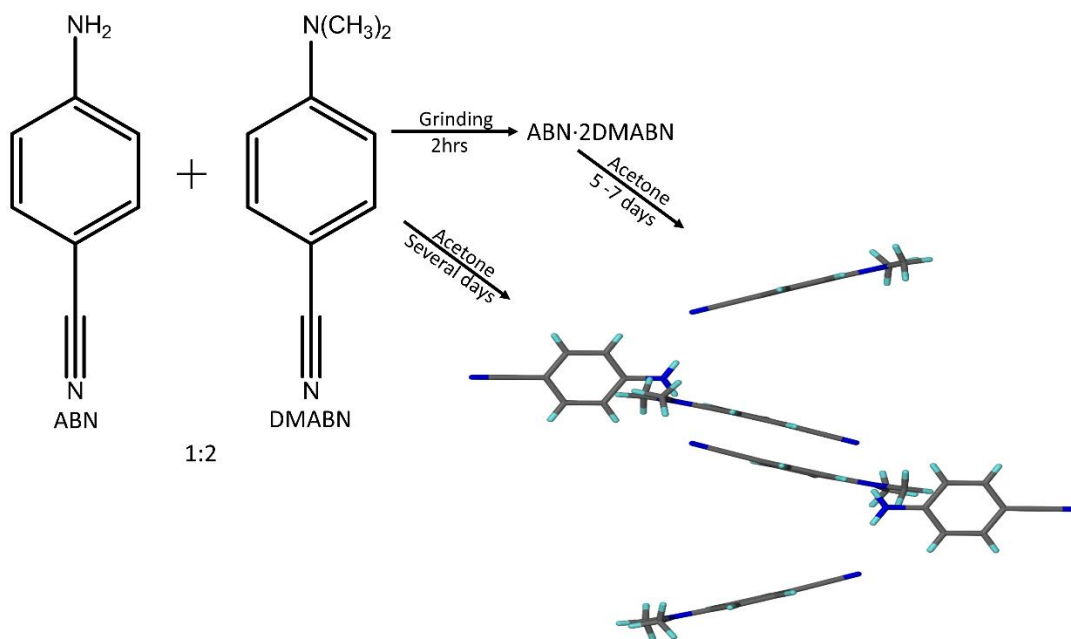

**Scheme S1:** Formation of the **ABN·2DMABN** cocrystal.

## 2) Single crystal X-ray diffraction measurements

Single-crystal X-ray diffraction data were collected using a Bruker APEX-II Quasar CCD arear detector diffractometer equipped with an Oxford Cryosystems 700Plus cryostat. A multilayer monochromator with Mo K $\alpha$  radiation ( $\lambda = 0.71073 \text{ \AA}$ ) from an Incoatec I $\mu$ S micro source was used. Data reduction was carried out by means of a standard procedure using the Bruker software package SAINT.<sup>1</sup> Absorption corrections and correction of other systematic errors were performed using SADABS.<sup>2,3</sup> The structures were solved by direct methods using SHELXS-2016 and refined using SHELXL-2016.<sup>4</sup> X-Seed was used as the graphical interface for the SHELX program suite.<sup>5</sup> Hydrogen atoms were placed in calculated positions using riding models.

**Table S1.** Crystallographic details for ABN·2DMABN cocrystal

| Identification code                         | ABN·2DMAB<br>N 300 K                                                 | ABN·2DMAB<br>N 280 K                                                 | ABN·2DMAB<br>N 260 K                                                 | ABN·2DMAB<br>N 240 K                                                 | ABN·2DMAB<br>N 220 K                                                 | ABN·2DMAB<br>N 200 K                                                 |
|---------------------------------------------|----------------------------------------------------------------------|----------------------------------------------------------------------|----------------------------------------------------------------------|----------------------------------------------------------------------|----------------------------------------------------------------------|----------------------------------------------------------------------|
| Empirical formula                           | C <sub>25</sub> H <sub>26</sub> N <sub>6</sub>                       |
| Formula weight/g/mol                        | 410.52                                                               | 410.52                                                               | 410.52                                                               | 410.52                                                               | 410.52                                                               | 410.52                                                               |
| Temperature/K                               | 300(2)                                                               | 280(2)                                                               | 260(2)                                                               | 240(2)                                                               | 220(2)                                                               | 200(2)                                                               |
| Crystal system                              | Monoclinic                                                           | Monoclinic                                                           | Monoclinic                                                           | Monoclinic                                                           | Monoclinic                                                           | Monoclinic                                                           |
| Space group                                 | <i>P</i> 2 <sub>1</sub> / <i>n</i>                                   |
| <i>a</i> /Å                                 | 9.8177(10)                                                           | 9.8071(2)                                                            | 9.7994(2)                                                            | 9.7912(2)                                                            | 9.7836(2)                                                            | 9.7770(3)                                                            |
| <i>b</i> /Å                                 | 25.6597(31)                                                          | 25.6011(7)                                                           | 25.5488(7)                                                           | 25.4967(8)                                                           | 25.4438(8)                                                           | 25.3964(10)                                                          |
| <i>c</i> /Å                                 | 19.3047(23)                                                          | 19.2577(5)                                                           | 19.2173(5)                                                           | 19.1789(5)                                                           | 19.1399(6)                                                           | 19.1058(7)                                                           |
| $\alpha$ /°                                 | 90                                                                   | 90.00                                                                | 90.00                                                                | 90.00                                                                | 90.00                                                                | 90.00                                                                |
| $\beta$ /°                                  | 104.384(4)                                                           | 104.347(1)                                                           | 104.313(1)                                                           | 104.291(1)                                                           | 104.278(1)                                                           | 104.272(1)                                                           |
| $\gamma$ /°                                 | 90                                                                   | 90.00                                                                | 90.00                                                                | 90.00                                                                | 90.00                                                                | 90.00                                                                |
| Volume/Å <sup>3</sup>                       | 4710.8(9)                                                            | 4684.3(2)                                                            | 4662.0(2)                                                            | 4639.7(2)                                                            | 4617.4(2)                                                            | 4597.6(3)                                                            |
| Z                                           | 8                                                                    | 8                                                                    | 8                                                                    | 8                                                                    | 8                                                                    | 8                                                                    |
| $\rho_{\text{calc}}$ /cm <sup>3</sup>       | 1.158                                                                | 1.164                                                                | 1.170                                                                | 1.175                                                                | 1.181                                                                | 1.186                                                                |
| $\mu$ /mm <sup>-1</sup>                     | 0.072                                                                | 0.072                                                                | 0.072                                                                | 0.073                                                                | 0.073                                                                | 0.073                                                                |
| F(000)                                      | 1744                                                                 | 1744                                                                 | 1744                                                                 | 1744                                                                 | 1744                                                                 | 1744                                                                 |
| Crystal size/mm <sup>3</sup>                | 0.335 × 0.242 ×<br>0.116                                             | 0.334 × 0.241 ×<br>0.115                                             | 0.333 × 0.24 ×<br>0.114                                              | 0.332 × 0.239 ×<br>0.113                                             | 0.331 × 0.238 ×<br>0.112                                             | 0.33 × 0.237 ×<br>0.111                                              |
| Radiation                                   | MoK $\alpha$ ( $\lambda =$<br>0.71073)                               |
| $\theta$ range for data collection/°        | 1.35 to 28.44                                                        | 1.35 to 28.34                                                        | 1.35 to 28.51                                                        | 1.36 to 28.39                                                        | 1.36 to 28.29                                                        | 1.36 to 28.32                                                        |
| Index ranges                                | -13 ≤ <i>h</i> ≤ 11,<br>-34 ≤ <i>k</i> ≤ 34,<br>-25 ≤ <i>l</i> ≤ 25  | -11 ≤ <i>h</i> ≤ 13,<br>-34 ≤ <i>k</i> ≤ 34,<br>-25 ≤ <i>l</i> ≤ 25  | -11 ≤ <i>h</i> ≤ 13,<br>-34 ≤ <i>k</i> ≤ 34,<br>-25 ≤ <i>l</i> ≤ 25  | -11 ≤ <i>h</i> ≤ 13,<br>-34 ≤ <i>k</i> ≤ 34,<br>-25 ≤ <i>l</i> ≤ 25  | -11 ≤ <i>h</i> ≤ 13,<br>-33 ≤ <i>k</i> ≤ 33,<br>-25 ≤ <i>l</i> ≤ 25  | -11 ≤ <i>h</i> ≤ 13,<br>-33 ≤ <i>k</i> ≤ 33,<br>-25 ≤ <i>l</i> ≤ 25  |
| Reflections collected                       | 166146                                                               | 165295                                                               | 163100                                                               | 163738                                                               | 162781                                                               | 147347                                                               |
| Independent reflections                     | 11782 [R <sub>int</sub> =<br>0.0759, R <sub>sigma</sub> =<br>0.0349] | 11659 [R <sub>int</sub> =<br>0.0854, R <sub>sigma</sub> =<br>0.0394] | 11736 [R <sub>int</sub> =<br>0.0836, R <sub>sigma</sub> =<br>0.0396] | 11588 [R <sub>int</sub> =<br>0.0808, R <sub>sigma</sub> =<br>0.0384] | 11444 [R <sub>int</sub> =<br>0.0788, R <sub>sigma</sub> =<br>0.0361] | 11422 [R <sub>int</sub> =<br>0.0768, R <sub>sigma</sub> =<br>0.0374] |
| Data/restraints/parameters                  | 11782/0/567                                                          | 11659/0/567                                                          | 11736/0/567                                                          | 11588/0/567                                                          | 11444/0/567                                                          | 11422/0/567                                                          |
| Goodness-of-fit on F <sup>2</sup>           | 1.035                                                                | 1.061                                                                | 1.066                                                                | 1.046                                                                | 1.046                                                                | 1.051                                                                |
| Final R indexes [I >= 2 $\sigma$ (I)]       | R <sub>1</sub> = 0.0727,<br>wR <sub>2</sub> = 0.2049                 | R <sub>1</sub> = 0.0703,<br>wR <sub>2</sub> = 0.1864                 | R <sub>1</sub> = 0.0683,<br>wR <sub>2</sub> = 0.1839                 | R <sub>1</sub> = 0.0647,<br>wR <sub>2</sub> = 0.1615                 | R <sub>1</sub> = 0.0639,<br>wR <sub>2</sub> = 0.1606                 | R <sub>1</sub> = 0.0613,<br>wR <sub>2</sub> = 0.1490                 |
| Final R indexes [all data]                  | R <sub>1</sub> = 0.1592,<br>wR <sub>2</sub> = 0.2735                 | R <sub>1</sub> = 0.1653,<br>wR <sub>2</sub> = 0.2595                 | R <sub>1</sub> = 0.1578,<br>wR <sub>2</sub> = 0.2543                 | R <sub>1</sub> = 0.1472,<br>wR <sub>2</sub> = 0.2279                 | R <sub>1</sub> = 0.1359,<br>wR <sub>2</sub> = 0.2171                 | R <sub>1</sub> = 0.1337,<br>wR <sub>2</sub> = 0.2041                 |
| Largest diff. peak/hole / e Å <sup>-3</sup> | 0.14/-0.16                                                           | 0.188/-0.191                                                         | 0.17/-0.19                                                           | 0.18/-0.22                                                           | 0.18/-0.21                                                           | 0.21/-0.21                                                           |
| Mosaicity                                   | 0.39                                                                 | 0.38                                                                 | 0.38                                                                 | 0.38                                                                 | 0.38                                                                 | 0.38                                                                 |
| CCDC number                                 | 1555132                                                              | 1555131                                                              | 1555130                                                              | 1555129                                                              | 1555128                                                              | 1555127                                                              |

**Table S1.** Crystallographic details for **ABN·2DMABN** cocrystal continued.

| Identification code                            | ABN·2DMABN_<br>180 K                                                 | ABN·2DMABN_<br>160 K                                                 | ABN·2DMABN_<br>140 K                                                 | ABN·2DMABN_<br>120 K                                                 | ABN·2DMABN_<br>100 K                                                 |
|------------------------------------------------|----------------------------------------------------------------------|----------------------------------------------------------------------|----------------------------------------------------------------------|----------------------------------------------------------------------|----------------------------------------------------------------------|
| Empirical formula                              | C <sub>25</sub> H <sub>26</sub> N <sub>6</sub>                       |
| Formula weight                                 | 410.52                                                               | 410.52                                                               | 410.52                                                               | 410.52                                                               | 410.52                                                               |
| Temperature/K                                  | 180(2)                                                               | 160(2)                                                               | 140(2)                                                               | 120(2)                                                               | 100(2)                                                               |
| Crystal system                                 | Monoclinic                                                           | Monoclinic                                                           | Monoclinic                                                           | Monoclinic                                                           | Monoclinic                                                           |
| Space group                                    | <i>P</i> 2 <sub>1</sub> / <i>n</i>                                   |
| <i>a</i> /Å                                    | 9.7754(3)                                                            | 9.7730(3)                                                            | 9.7661(3)                                                            | 9.7650(3)                                                            | 9.7654(4)                                                            |
| <i>b</i> /Å                                    | 25.3489(8)                                                           | 25.2982(8)                                                           | 25.2392(8)                                                           | 25.1863(9)                                                           | 25.1269(11)                                                          |
| <i>c</i> /Å                                    | 19.0721(6)                                                           | 19.0409(6)                                                           | 19.0103(6)                                                           | 18.9850(7)                                                           | 18.9626(8)                                                           |
| <i>a</i> /°                                    | 90.00                                                                | 90.00                                                                | 90.00                                                                | 90.00                                                                | 90.00                                                                |
| <i>β</i> /°                                    | 104.284(10)                                                          | 104.279(1)                                                           | 104.274(1)                                                           | 104.254(1)                                                           | 104.199 (1)                                                          |
| <i>γ</i> /°                                    | 90.00                                                                | 90.00                                                                | 90.00                                                                | 90.00                                                                | 90.00                                                                |
| Volume/Å <sup>3</sup>                          | 4579.9(2)                                                            | 4561.0(2)                                                            | 4541.2(2)                                                            | 4525.5(3)                                                            | 4510.8(3)                                                            |
| <i>Z</i>                                       | 8                                                                    | 8                                                                    | 8                                                                    | 8                                                                    | 8                                                                    |
| $\rho_{\text{calc}}/\text{cm}^3$               | 1.191                                                                | 1.196                                                                | 1.201                                                                | 1.205                                                                | 1.209                                                                |
| $\mu/\text{mm}^{-1}$                           | 0.074                                                                | 0.074                                                                | 0.074                                                                | 0.074                                                                | 0.075                                                                |
| <i>F</i> (000)                                 | 1744.0                                                               | 1744.0                                                               | 1744.0                                                               | 1744.0                                                               | 1744.0                                                               |
| Crystal size/mm <sup>3</sup>                   | 0.329 × 0.236 ×<br>0.11                                              | 0.328 × 0.235 ×<br>0.109                                             | 0.327 × 0.234 ×<br>0.108                                             | 0.326 × 0.233 ×<br>0.107                                             | 0.325 × 0.232 ×<br>0.106                                             |
| Radiation                                      | MoK $\alpha$ ( $\lambda$ =<br>0.71073)                               |
| $\theta$ range for data<br>collection/°        | 1.61 to 28.37                                                        | 2.66 to 28.35                                                        | 138 to 28.36                                                         | 1.37 to 28.38                                                        | 1.37 to 28.34                                                        |
| Index ranges                                   | -11 ≤ <i>h</i> ≤ 13,<br>-33 ≤ <i>k</i> ≤ 33,<br>-25 ≤ <i>l</i> ≤ 25  | -11 ≤ <i>h</i> ≤ 13,<br>-33 ≤ <i>k</i> ≤ 33,<br>-25 ≤ <i>l</i> ≤ 25  | -11 ≤ <i>h</i> ≤ 13,<br>-33 ≤ <i>k</i> ≤ 33,<br>-25 ≤ <i>l</i> ≤ 25  | -11 ≤ <i>h</i> ≤ 13,<br>-33 ≤ <i>k</i> ≤ 33,<br>-25 ≤ <i>l</i> ≤ 25  | -11 ≤ <i>h</i> ≤ 13,<br>-33 ≤ <i>k</i> ≤ 33,<br>-25 ≤ <i>l</i> ≤ 25  |
| Reflections collected                          | 211399                                                               | 210216                                                               | 209426                                                               | 154099                                                               | 178039                                                               |
| Independent<br>reflections                     | 11269 [R <sub>int</sub> =<br>0.0948, R <sub>sigma</sub> =<br>0.0359] | 11218 [R <sub>int</sub> =<br>0.0952, R <sub>sigma</sub> =<br>0.0354] | 11237 [R <sub>int</sub> =<br>0.0954, R <sub>sigma</sub> =<br>0.0352] | 11236 [R <sub>int</sub> =<br>0.0909, R <sub>sigma</sub> =<br>0.0389] | 11176 [R <sub>int</sub> =<br>0.0952, R <sub>sigma</sub> =<br>0.0379] |
| Data/restraints/parame-<br>ters                | 11269/0/567                                                          | 11218/0/567                                                          | 11237/0/567                                                          | 11236/0/567                                                          | 11176/0/567                                                          |
| Goodness-of-fit on F <sup>2</sup>              | 1.026                                                                | 1.020                                                                | 1.037                                                                | 1.026                                                                | 1.033                                                                |
| Final R indexes<br>[I > 2 $\sigma$ (I)]        | R <sub>1</sub> = 0.0898, wR <sub>2</sub><br>= 0.2265                 | R <sub>1</sub> = 0.0953, wR <sub>2</sub><br>= 0.2229                 | R <sub>1</sub> = 0.0888, wR <sub>2</sub><br>= 0.2262                 | R <sub>1</sub> = 0.0876, wR <sub>2</sub><br>= 0.2192                 | R <sub>1</sub> = 0.0886, wR <sub>2</sub><br>= 0.2249                 |
| Final R indexes [all<br>data]                  | R <sub>1</sub> = 0.1472, wR <sub>2</sub><br>= 0.3061                 | R <sub>1</sub> = 0.1425, wR <sub>2</sub><br>= 0.2958                 | R <sub>1</sub> = 0.1366, wR <sub>2</sub><br>= 0.2896                 | R <sub>1</sub> = 0.1383, wR <sub>2</sub><br>= 0.2858                 | R <sub>1</sub> = 0.1321, wR <sub>2</sub><br>= 0.2833                 |
| Largest diff. peak/hole<br>/ e Å <sup>-3</sup> | 0.29/-0.36                                                           | 0.29/-0.40                                                           | 0.39/-0.42                                                           | 0.34/-0.45                                                           | 0.49/-0.48                                                           |
| Mosaicity                                      | 0.38                                                                 | 0.38                                                                 | 0.38                                                                 | 0.38                                                                 | 0.38                                                                 |
| CCDC number                                    | 1555126                                                              | 1555125                                                              | 1555124                                                              | 1555122                                                              | 1555123                                                              |

**3) Unit cell parameters for ABN·2DMABN cocrystal from 300 to 100 K at 20 K intervals****Table S2.** Unit cell axes and cell volume at variable temperatures for **ABN·2DMABN** Cocrystal

| <i>T</i><br>(K) | <i>a</i> (Å) | St.<br>dev.* | <i>b</i> (Å) | St.<br>dev.* | <i>c</i> (Å) | St. dev.<br>* | $\beta$ (°) | St. dev.<br>* | <i>V</i> (Å <sup>3</sup> ) | St.<br>dev.* | Crystal<br>mosaicity |
|-----------------|--------------|--------------|--------------|--------------|--------------|---------------|-------------|---------------|----------------------------|--------------|----------------------|
| 300             | 9.8177       | 0.001        | 25.6597      | 0.0031       | 19.3047      | 0.0023        | 104.384     | 0.004         | 4710.78                    | 0.09         | 0.39                 |
| 280             | 9.8071       | 0.0002       | 25.6011      | 0.0007       | 19.2577      | 0.0005        | 104.347     | 0.001         | 4684.29                    | 0.02         | 0.38                 |
| 260             | 9.7994       | 0.0002       | 25.5488      | 0.0007       | 19.2173      | 0.0005        | 104.313     | 0.001         | 4661.95                    | 0.02         | 0.38                 |
| 240             | 9.7912       | 0.0002       | 25.4967      | 0.0008       | 19.1789      | 0.0005        | 104.291     | 0.001         | 4639.72                    | 0.02         | 0.38                 |
| 220             | 9.7836       | 0.0002       | 25.4438      | 0.0008       | 19.1399      | 0.0006        | 104.278     | 0.001         | 4617.36                    | 0.02         | 0.38                 |
| 200             | 9.7770       | 0.0003       | 25.3964      | 0.001        | 19.1058      | 0.0007        | 104.272     | 0.001         | 4597.56                    | 0.03         | 0.38                 |
| 180             | 9.7754       | 0.0003       | 25.3489      | 0.0008       | 19.0721      | 0.0006        | 104.284     | 0.001         | 4579.88                    | 0.02         | 0.38                 |
| 160             | 9.7703       | 0.0003       | 25.2982      | 0.0008       | 19.0409      | 0.0006        | 104.279     | 0.001         | 4560.96                    | 0.02         | 0.38                 |
| 140             | 9.7661       | 0.0003       | 25.2392      | 0.0008       | 19.0103      | 0.0006        | 104.270     | 0.001         | 4541.16                    | 0.02         | 0.38                 |
| 120             | 9.7650       | 0.0003       | 25.1863      | 0.0009       | 18.9850      | 0.0007        | 104.254     | 0.001         | 4525.50                    | 0.03         | 0.38                 |
| 100             | 9.7654       | 0.0004       | 25.1269      | 0.0011       | 18.9626      | 0.0008        | 104.199     | 0.001         | 4510.75                    | 0.03         | 0.38                 |

\*Standard deviation calculated from unit cell refinement using the Apex III software suite.

#### 4) Powder X-ray diffraction measurements

Powder X-ray diffraction data were collected using a Bruker D2 PHASER equipped with Lynxeye 1D detector and Ni-filtered Cu K $\alpha$  radiation ( $\lambda = 1.5418 \text{ \AA}$ ; 30 kV, 10 mA generator parameters; restricted by a 1.0 mm divergence slit and a 2.5 Soller collimator). The high resolution PXRD pattern was recorded using Cu K $\alpha$  radiation ( $\lambda = 1.5418 \text{ \AA}$ , 40 kV and 30 mA) on a PANalytical X'pert PRO instrument operating in Bragg-Brentano geometry. Samples were placed in sealed glass capillaries and analysed at room temperature.

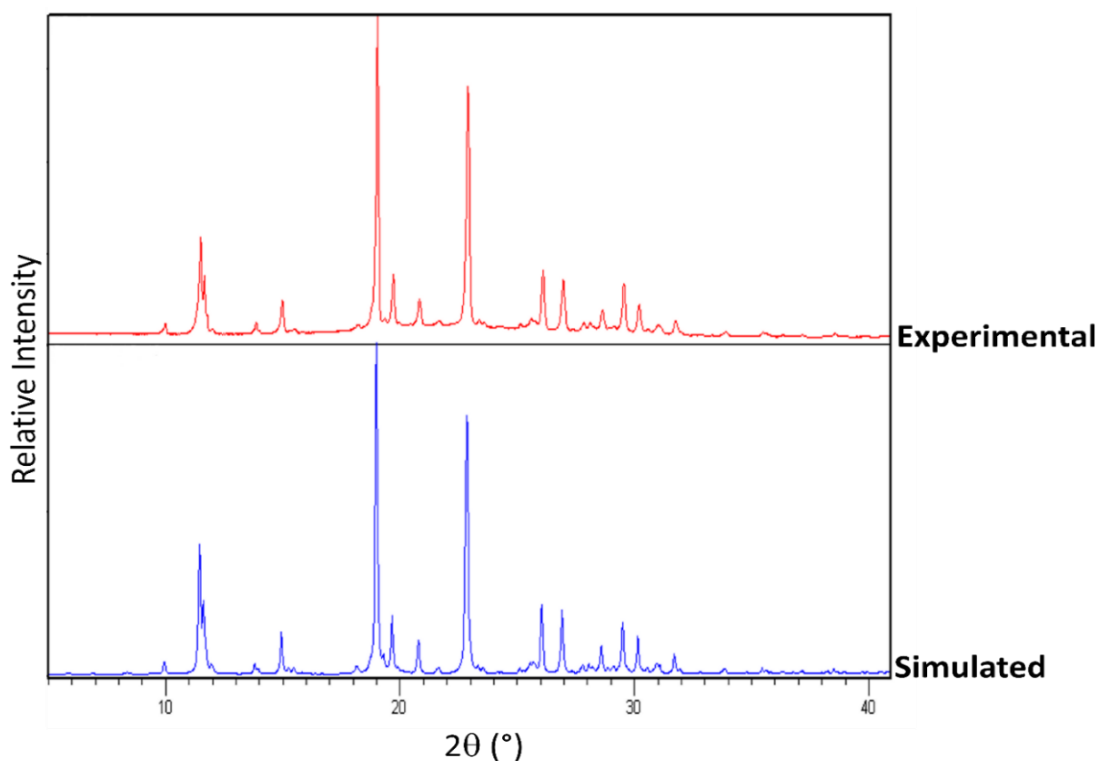

**Figure S1:** PXRD patterns of the experimental and simulated **ABN·2DMABN** cocrystal.

#### 5) Hot stage microscopy

A Linkam DSC600 temperature-controlled hot stage equipped with a digital video camera and LNP95 liquid nitrogen cooling pump was used to record temperature-dependent changes in the appearance of cocrystal **ABN·2DMABN**. The stage was operated via a T95-System Controller. The temperature was ramped from 300 to 100 K and back to 300 K at a ramp rate of  $5 \text{ K min}^{-1}$ .

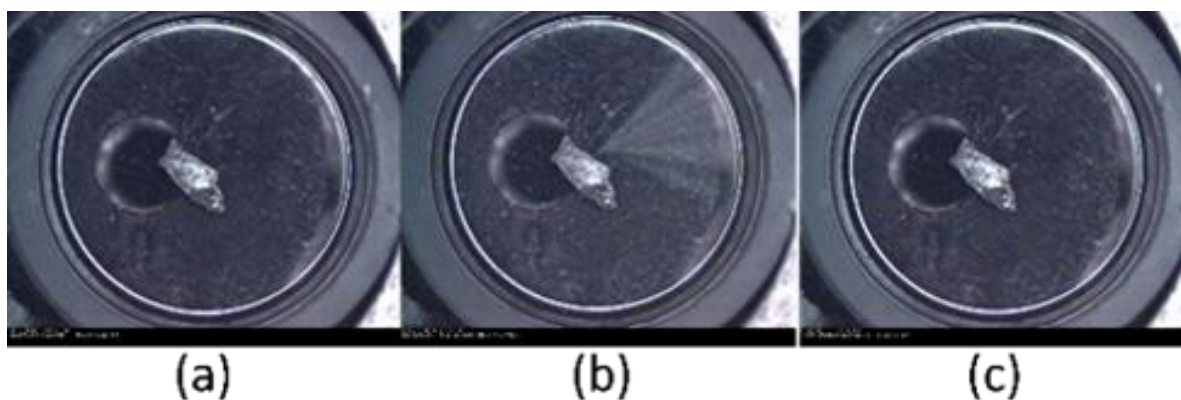

**Figure S2:** The micrographs of **ABN·2DMABN** at a) 300 K cooled to b) 100 K and reheated to c) 300 K.

### 6) Differential Scanning Calorimetry

Differential scanning calorimetry of **ABN·2DMABN** was carried out on TA DSC-Q100 instrument. Crystals were taken on a Tzero aluminium pan and connected to LNG cryostat for low temperature analysis. The low temperature DSC analysis was carried out by cooling from 300 to 100 K and heated back to 300 K at the heating rate of  $5 \text{ K min}^{-1}$ . Also, the crystal was analysed by heating from room temperature (300 K) to the selected temperature at rate of  $5 \text{ K min}^{-1}$ .

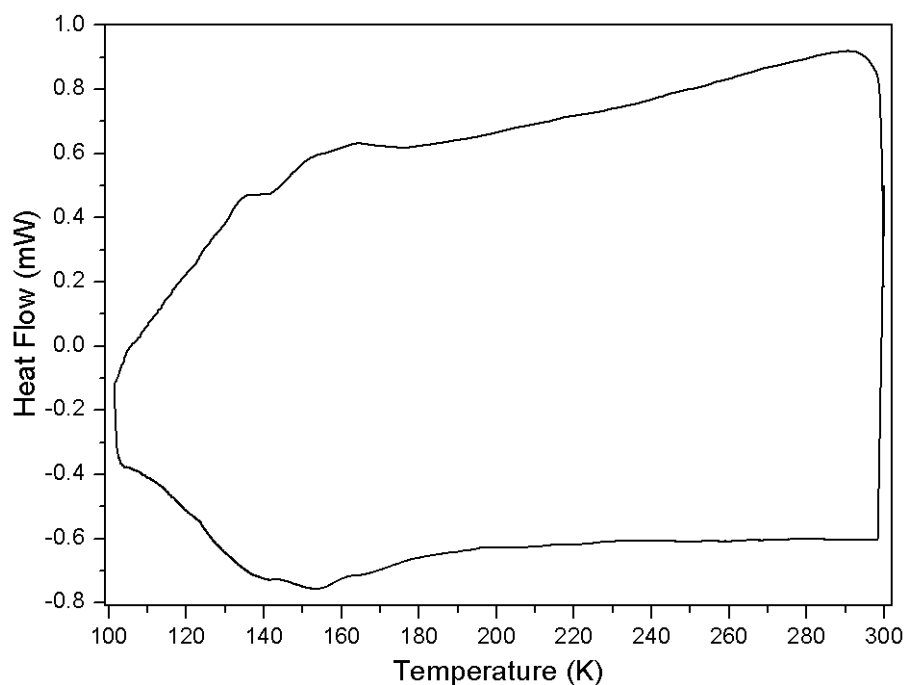

**Figure S3:** The DSC thermogram of the cocrystal **ABN·2DMABN** for the range 100 to 300 K showing no thermal events (no phase change).

## 7) Thermal expansion coefficients

**Table S3.** Linear and volumetric thermal expansion coefficients for **ABN·2DMABN** over different temperature ranges.

| Temperature Range (K) | $\alpha_{x1}$ (MK <sup>-1</sup> ) | $\alpha_{x2}$ (MK <sup>-1</sup> ) | $\alpha_{x3}$ (MK <sup>-1</sup> ) | $\alpha_v$ (MK <sup>-1</sup> ) |
|-----------------------|-----------------------------------|-----------------------------------|-----------------------------------|--------------------------------|
| 100 – 120             | -17.66                            | 62.55                             | 118.34                            | 163.14                         |
| 120 – 140             | 2.07                              | 66.69                             | 105.13                            | 173.88                         |
| 140 – 160             | 19.30                             | 80.76                             | 117.02                            | 217.13                         |
| 160 – 180             | 24.57                             | 82.42                             | 100.31                            | 207.38                         |
| 180 – 200             | 7.89                              | 91.40                             | 93.78                             | 193.10                         |
| 200 – 220             | 32.09                             | 89.66                             | 93.41                             | 215.27                         |
| 220 – 240             | 35.88                             | 102.07                            | 104.06                            | 242.15                         |
| 240 – 260             | 36.91                             | 100.29                            | 102.27                            | 239.61                         |
| 260 – 280             | 31.15                             | 102.46                            | 105.79                            | 239.52                         |
| 280 – 300             | 45.06                             | 114.58                            | 122.90                            | 282.74                         |

**Table S4.** Linear and volumetric thermal expansion coefficients for **ABN·2DMABN** over different temperature ranges that include 300 K.

| Temperature Range (K) | $\alpha_{x1}$ (MK <sup>-1</sup> ) | $\alpha_{x2}$ (MK <sup>-1</sup> ) | $\alpha_{x3}$ (MK <sup>-1</sup> ) | $\alpha_v$ (MK <sup>-1</sup> ) |
|-----------------------|-----------------------------------|-----------------------------------|-----------------------------------|--------------------------------|
| 100 – 300             | 24.26                             | 90.88                             | 105.01                            | 222.01                         |
| 120 – 300             | 27.13                             | 94.22                             | 103.68                            | 226.72                         |
| 140 – 300             | 29.53                             | 96.91                             | 102.90                            | 230.93                         |
| 160 – 300             | 31.33                             | 99.08                             | 101.93                            | 233.93                         |
| 180 – 300             | 33.46                             | 101.42                            | 102.54                            | 238.85                         |
| 200 – 300             | 36.26                             | 103.84                            | 104.41                            | 245.61                         |
| 220 – 300             | 36.90                             | 105.89                            | 107.21                            | 250.91                         |
| 240 – 300             | 37.16                             | 106.69                            | 109.49                            | 254.28                         |
| 260 – 300             | 38.14                             | 108.75                            | 114.60                            | 262.44                         |
| 280 – 300             | 45.06                             | 114.58                            | 122.90                            | 282.74                         |

## 8) Intermolecular interactions in the structure

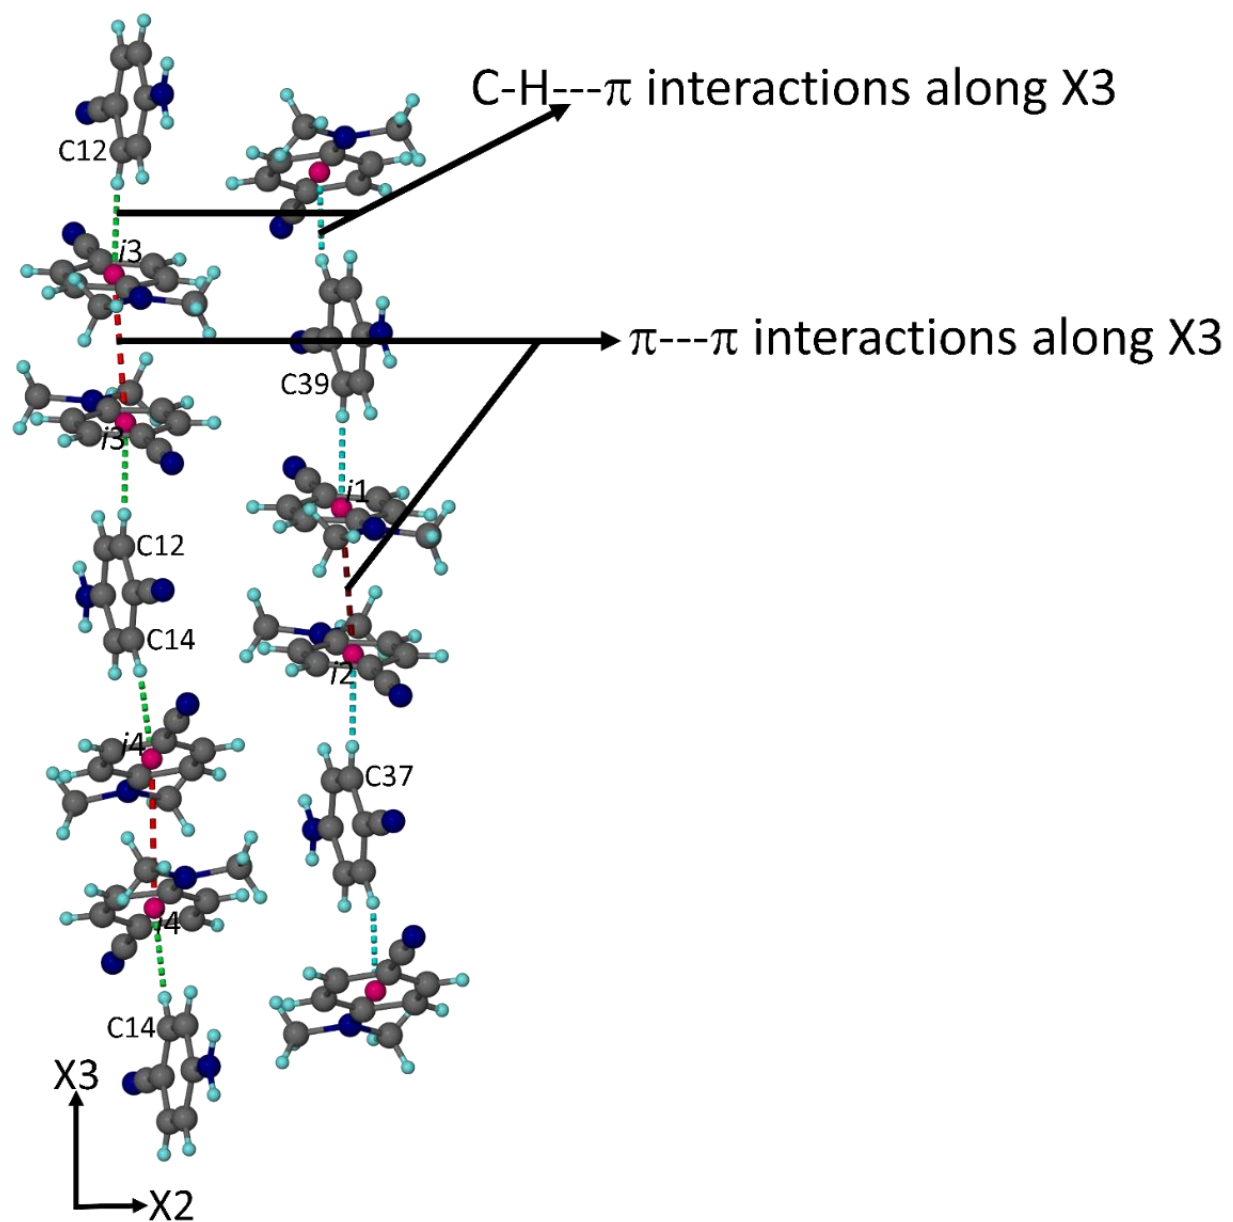

**Figure S4:** Perspective view showing C-H... $\pi$  and  $\pi$ ... $\pi$  interactions along the principal axis X3.



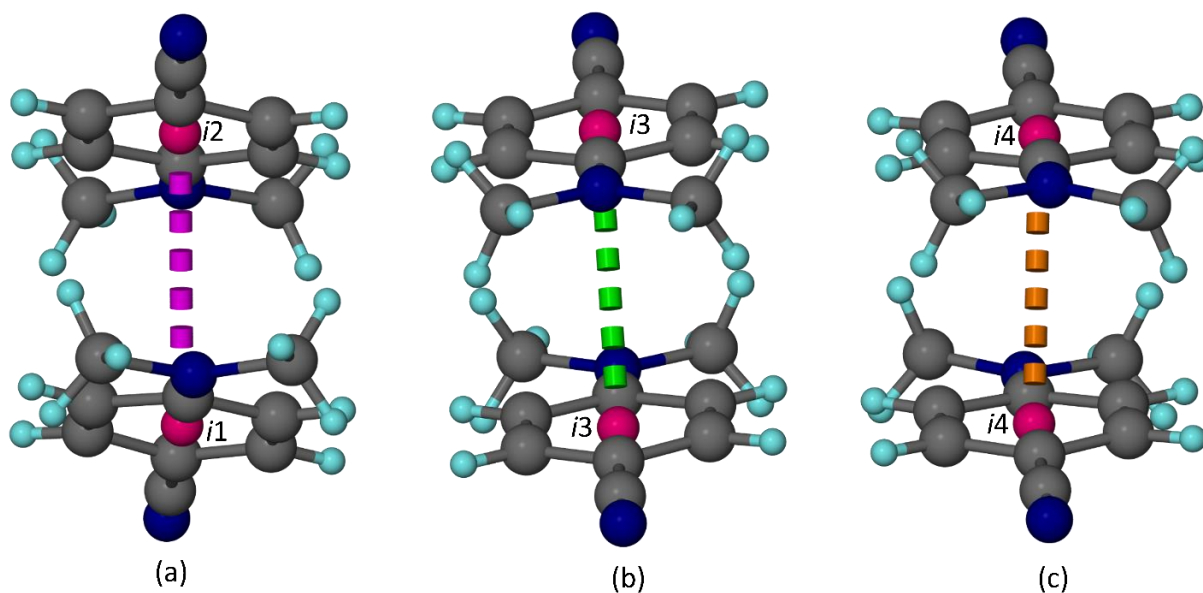

**Figure S5:** Views showing all the centroid-to-centroid distances ( $\text{\AA}$ ) along the principal axis X3 with (a)  $i1$ --- $i2$  (b)  $i3$ --- $i3$  and (c)  $i4$ --- $i4$ .  $i1$  is the centroid of C26-C31,  $i2$  is the centroid of C42-C47,  $i3$  is the centroid of C1-C6 and  $i4$  is the centroid of C17-C22.

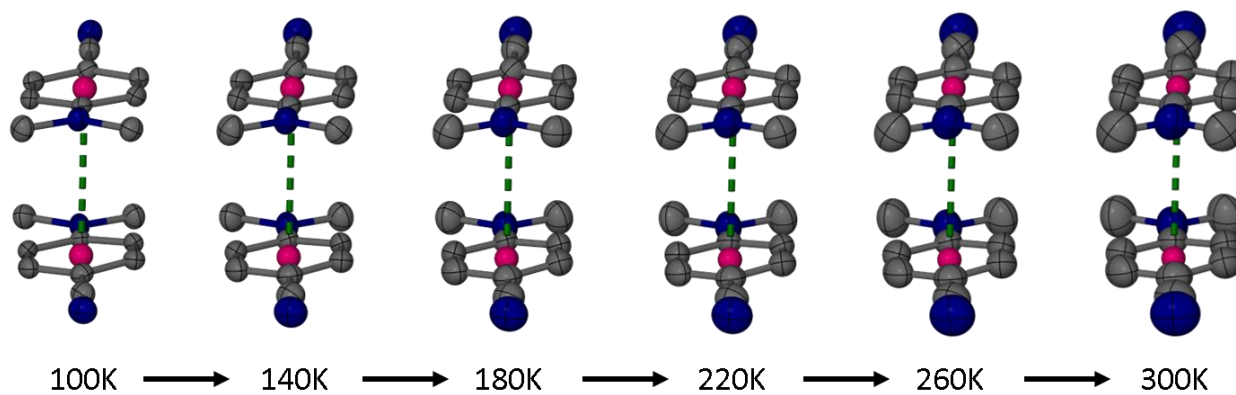

**Figure S6:** Views showing the increase in ellipsoids as the temperature increases along the principal axis X3 (30% probability).

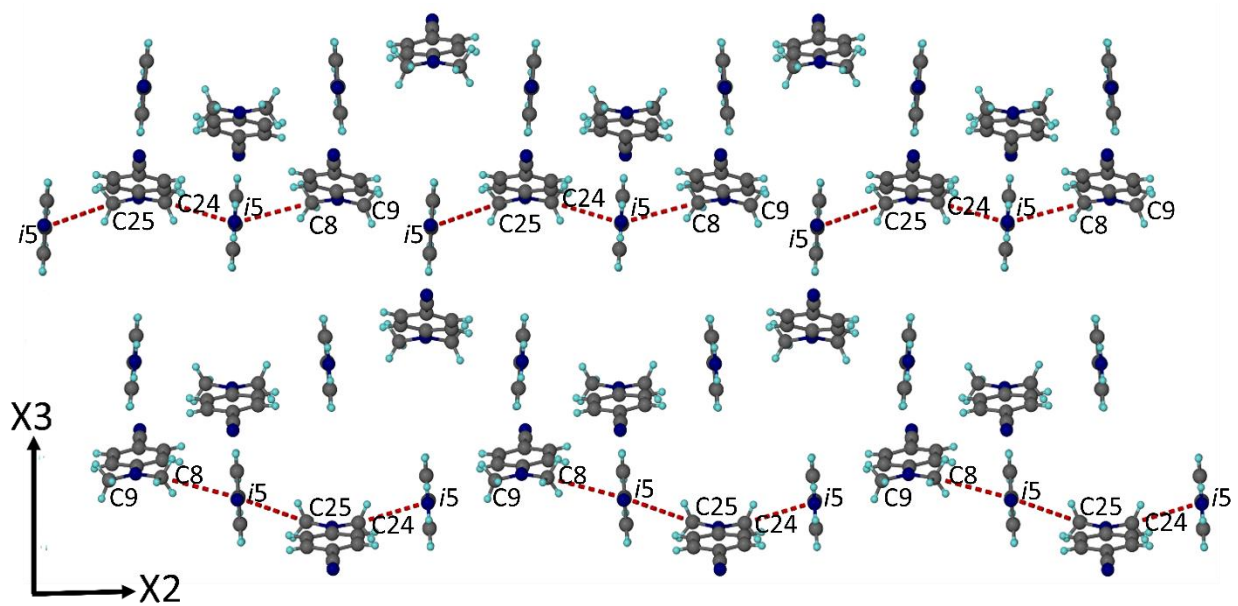

**Figure S7:** Perspective view showing C-H $\cdots$  $\pi$  interactions along the principal axis X2.

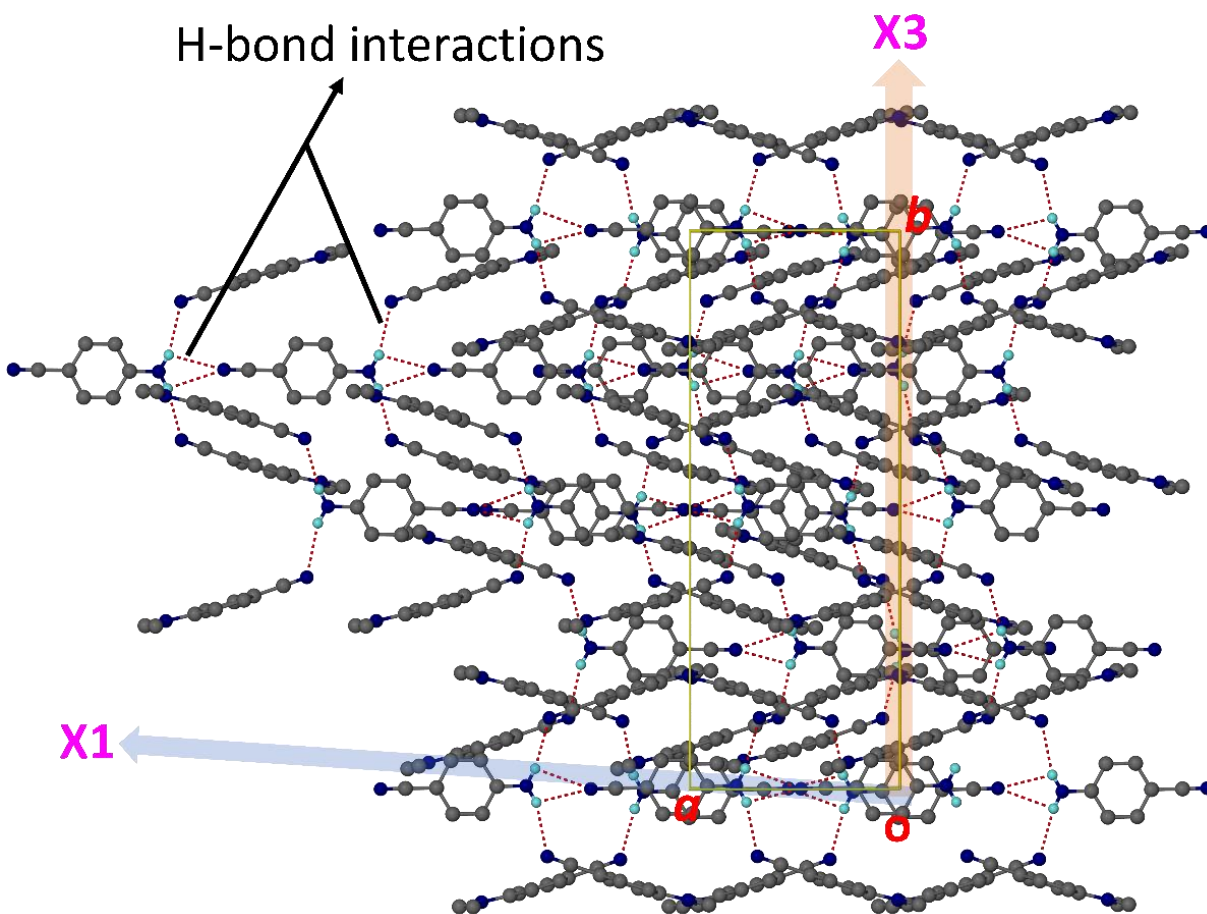

**Figure S8:** Perspective view of the ABN $\cdot$ 2DMABN cocrystal showing N-H $\cdots$ N hydrogen bonding interactions along the principal axis X1.

The program PLATON was used to generate a list of hydrogen bond distances ( $D \cdots A$ ) (Å) in the **ABN·2DMABN** cocrystal from 100 to 300 K.

**Table S5.** Some intermolecular interaction distances (Å) within the molecules at different temperatures for **ABN·2DMABN** cocrystal along the principal axis X3.

| Distance (Å)                                             | T (K)     |           |            |           |           |           |           |            |           |           |           | RC     |
|----------------------------------------------------------|-----------|-----------|------------|-----------|-----------|-----------|-----------|------------|-----------|-----------|-----------|--------|
|                                                          | 100       | 120       | 140        | 160       | 180       | 200       | 220       | 240        | 260       | 280       | 300       |        |
| $\pi \cdots \pi$<br>( <i>i1</i> --- <i>i2</i> )          | 3.8843(2) | 3.9064(1) | 3.9241(1)  | 3.9293(1) | 3.9536(1) | 3.9615(2) | 3.9704(1) | 3.9819(1)  | 3.9910(1) | 4.0021(1) | 4.0134(5) | 0.0332 |
| $\pi \cdots \pi$<br>( <i>i3</i> --- <i>i3</i> )          | 3.9594(2) | 3.9801(1) | 3.9960(1)  | 4.0109(1) | 4.0209(1) | 4.0286(2) | 4.0384(1) | 4.0472 (1) | 4.0526(1) | 4.0612(1) | 4.0724(5) | 0.0285 |
| $\pi \cdots \pi$<br>( <i>i4</i> --- <i>i4</i> )          | 3.8275(2) | 3.8488(1) | 3.8679(1)  | 3.8845(1) | 3.8948(1) | 3.9062(2) | 3.9156(1) | 3.9261(1)  | 3.9360(1) | 3.9360(1) | 3.9565(5) | 0.0337 |
| <b>C12-H12</b> ... $\pi$<br>( <b>C12</b> --- <i>i3</i> ) | 3.4874(1) | 3.4948(1) | 3.5032(1)  | 3.5130(1) | 3.5247(1) | 3.5329(1) | 3.5429(1) | 3.5575(1)  | 3.5710(1) | 3.5847(1) | 3.5969(4) | 0.0314 |
| <b>C14-H14</b> ... $\pi$<br>( <b>C14</b> --- <i>i4</i> ) | 3.4770(1) | 3.4852(1) | 3.4983(1)  | 3.5091(1) | 3.5226(1) | 3.5298(1) | 3.5425(1) | 3.5543(1)  | 3.5679(1) | 3.5809(1) | 3.5956(4) | 0.0341 |
| <b>C37-H37</b> ... $\pi$<br>( <b>C37</b> --- <i>i2</i> ) | 3.5245(1) | 3.5307(1) | 3.5404(1)  | 3.5500(1) | 3.5649(1) | 3.5688(1) | 3.5813(1) | 3.5917(1)  | 3.6064(1) | 3.6202(1) | 3.6324(4) | 0.0306 |
| <b>C39-H39</b> ... $\pi$<br>( <b>C39</b> --- <i>i1</i> ) | 3.4453(1) | 3.4530(1) | 3.4644 (1) | 3.4760(1) | 3.4870(1) | 3.4989(1) | 3.5097(1) | 3.5228(1)  | 3.5351(1) | 3.5463(1) | 3.5619(4) | 0.0338 |

*i1*= centroid of C26-C31, *i2*= centroid of C42-C47, *i3*= centroid of C1-C6 and *i4*= centroid of C17-C22.

RC= Relative change with respect to 100 K.

**Table S6.** Some important C-H... $\pi$  interactions within the molecules at different temperatures for **ABN·2DMABN** cocrystal along X2.

| Distance (Å)                                              | T (K)     |           |           |           |           |           |           |           |           |           |           | RC     |
|-----------------------------------------------------------|-----------|-----------|-----------|-----------|-----------|-----------|-----------|-----------|-----------|-----------|-----------|--------|
|                                                           | 100       | 120       | 140       | 160       | 180       | 200       | 220       | 240       | 260       | 280       | 300       |        |
| <b>C8-H8C</b> ... $\pi$<br>( <b>C8</b> ... <i>i5</i> )    | 4.0048(1) | 3.9943(1) | 3.9899(1) | 3.9897(1) | 3.9966(1) | 4.0138(1) | 4.0259(1) | 4.0425(1) | 4.0587(1) | 4.0707(1) | 4.0872(4) | 0.0206 |
| <b>C24-H24C</b> ... $\pi$<br>( <b>C24</b> ... <i>i5</i> ) | 3.6578(1) | 3.6650(1) | 3.6738(1) | 3.6845(1) | 3.6908(1) | 3.6948(1) | 3.7015(1) | 3.7064(1) | 3.7111(1) | 3.7171(1) | 3.7243(4) | 0.0182 |
| <b>C25-H25B</b> ... $\pi$<br>( <b>C25</b> ... <i>i5</i> ) | 4.1145(1) | 4.1292(1) | 4.1453(1) | 4.1590(1) | 4.1766(1) | 4.1904(1) | 4.2075(1) | 4.2266(1) | 4.2455(1) | 4.2657(1) | 4.2837(4) | 0.0411 |

*i5*= centroid of C35-C40.

RC= Relative change with respect to 100 K.

**Table S7.** Hydrogen bond parameter, D (distance (Å) between H-bond donor and H-bond acceptor) at different temperatures for **ABN·2DMABN** cocrystal along X1.

| D···A (Å)           | T (K)    |          |          |          |          |          |          |          |          |          |          |
|---------------------|----------|----------|----------|----------|----------|----------|----------|----------|----------|----------|----------|
|                     | 100      | 120      | 140      | 160      | 180      | 200      | 220      | 240      | 260      | 280      | 300      |
| <b>N3-H3D...N6</b>  | 3.275(3) | 3.274(4) | 3.275(4) | 3.278(4) | 3.286(4) | 3.288(4) | 3.296(3) | 3.301(4) | 3.304(4) | 3.316(4) | 3.326(5) |
| <b>N3-H3E...N2</b>  | 3.334(3) | 3.343(4) | 3.341(4) | 3.346(4) | 3.350(4) | 3.350(4) | 3.352(3) | 3.356(4) | 3.359(4) | 3.362(4) | 3.358(5) |
| <b>N9-H9E...N8</b>  | 3.259(4) | 3.264(4) | 3.267(4) | 3.268(4) | 3.276(4) | 3.284(4) | 3.287(3) | 3.297(4) | 3.310(4) | 3.309(4) | 3.323(5) |
| <b>N9-H9D...N12</b> | 3.344(4) | 3.340(4) | 3.345(4) | 3.344(4) | 3.346(4) | 3.346(4) | 3.350(3) | 3.351(3) | 3.360(4) | 3.362(4) | 3.370(5) |

**Table S8.** Hydrogen bond parameter showing bond angle (°) between H-bond donor and H-bond acceptor at different temperatures for **ABN·2DMABN** cocrystal along X1.

| >D-H···A (°)        | T (K)      |            |            |            |            |            |            |            |            |            |            |
|---------------------|------------|------------|------------|------------|------------|------------|------------|------------|------------|------------|------------|
|                     | 100        | 120        | 140        | 160        | 180        | 200        | 220        | 240        | 260        | 280        | 300        |
| <b>N3-H3D...N6</b>  | 166.77(17) | 167.16(18) | 166.74(20) | 166.71(21) | 166.41(21) | 166.30(17) | 166.01(19) | 166.15(19) | 166.71(21) | 165.87(23) | 166.14(24) |
| <b>N3-H3E...N4</b>  | 161.65(17) | 161.66(18) | 161.75(19) | 161.88(21) | 161.93(21) | 161.90(17) | 162.09(19) | 161.97(19) | 161.56(20) | 161.98(23) | 161.91(24) |
| <b>N9-H9E...N8</b>  | 168.33(17) | 168.09(18) | 168.02(20) | 167.68(21) | 167.32(21) | 167.45(17) | 167.24(19) | 166.96(19) | 166.13(20) | 166.67(22) | 165.80(26) |
| <b>N9-H9D...N12</b> | 160.22(17) | 160.23(18) | 160.70(19) | 160.86(21) | 161.15(21) | 161.02(17) | 161.27(19) | 161.42(19) | 162.00(20) | 161.47(22) | 161.74(26) |

**Table S9.** Showing bond distance (Å) between H-donor Nitrogen and H-acceptor Nitrogen at different temperature for **ABN·2DMABN** cocrystal along the principal axis X1.

| Distance (Å)    | T (K)     |           |           |           |           |           |           |           |           |           |            | RC     |
|-----------------|-----------|-----------|-----------|-----------|-----------|-----------|-----------|-----------|-----------|-----------|------------|--------|
|                 | 100       | 120       | 140       | 160       | 180       | 200       | 220       | 240       | 260       | 280       | 300        |        |
| <b>N···N(Å)</b> |           |           |           |           |           |           |           |           |           |           |            |        |
| <b>N3···N4</b>  | 3.0106(1) | 3.0192(1) | 3.0207(1) | 3.0295(1) | 3.0376(1) | 3.0459(1) | 3.0533(1) | 3.0639(1) | 3.0739(1) | 3.0853(1) | 3.0990 (3) | 0.0296 |
| <b>N9···N10</b> | 3.0171(1) | 3.0174(1) | 3.0217(1) | 3.0281(1) | 3.0342(1) | 3.0434(1) | 3.0528(1) | 3.0627(1) | 3.0717(1) | 3.0834(1) | 3.0931 (3) | 0.0252 |

RC= Relative change with respect to 100 K.

## References

1. *SAINT Data Reduction Software*, Version 6.45; Bruker AXS Inc.: Madison, WI, 2003.
2. *SADABS*, Version 2.05; Bruker AXS Inc.: Madison, WI, 2002.
3. R. H. Blessing, An Empirical Correction for Absorption Anisotropy. *Acta Crystallogr., Sect. A: Found. Crystallogr.* 1995, **51**, 33–38.
4. G. M. Sheldrick, A Short History of SHELX. *Acta Crystallogr., Sect. A: Found. Crystallogr.* 2008, **64**, 112.

5. L. Barbour, X-Seed – A Software Tool for Supramolecular Crystallography. *J. Supramol. Chem.* 2001, **1**, 189.
